# Supplementary material for: Daily Intraperitoneal Administration of Rosiglitazone Does Not Improve Lung Function or Alveolarization in Preterm Rabbits Exposed to Hyperoxia
Source: MDPI journal article supplement (doi:10.3390/pharmaceutics14071507), 2022-07-20
Supplement: s1 [file s1]

# Daily Intraperitoneal Administration of Rosiglitazone Does Not Improve Lung Function or Alveolarization in Preterm Rabbits Exposed to Hyperoxia

**Table S1.** List of proteins significantly modulated by the treatment with rosiglitazone 1 mg/kg. Proteins were considered significantly upregulated in case of Log ( $p$ -value)  $\geq 1.3$  and Log<sub>2</sub> (Fold-change)  $\geq 0.5849$  and significantly downregulated in case of Log( $p$ -value)  $\geq 1.3$  and Log<sub>2</sub> (Fold-change)  $\leq -0.5849$ .

| Protein Description                                       | Genename | –Log ( $p$ -value) | Log <sub>2</sub> (FC) |
|-----------------------------------------------------------|----------|--------------------|-----------------------|
| Myelin P2 protein                                         | PMP2     | 4.71               | 2.44                  |
| Mitochondrial ribosomal protein L24                       | MRPL24   | 1.30               | 1.73                  |
| ROS proto-oncogene 1, receptor tyrosine kinase            | ROS1     | 1.42               | 1.53                  |
| Tyrosine-protein kinase                                   | FYN      | 1.44               | 1.44                  |
| Collectin subfamily member 12                             | COLEC12  | 1.80               | 1.13                  |
| Amine oxidase                                             | MAOA     | 1.94               | 1.09                  |
| Sideroflexin 3                                            | SFXN3    | 1.58               | 1.08                  |
| PHD finger protein 23                                     | PHF23    | 2.96               | 1.07                  |
| Matrilin 2                                                | MATN2    | 1.80               | 1.05                  |
| Histone deacetylase 3                                     | HDAC3    | 2.47               | 0.98                  |
| Spectrin beta chain                                       | SPTB     | 3.02               | 0.98                  |
| Adducin 2                                                 | ADD2     | 1.90               | 0.98                  |
| MAP7 domain-containing protein 3                          | MAP7D3   | 2.31               | 0.96                  |
| RNA binding motif protein 5                               | RBM5     | 1.83               | 0.92                  |
| CD59 glycoprotein                                         | CD59     | 1.62               | 0.90                  |
| Fraser extracellular matrix complex subunit 1             | FRAS1    | 1.31               | 0.86                  |
| Synuclein alpha                                           | SNCA     | 1.32               | 0.86                  |
| Calcitonin receptor like receptor                         | CALCRL   | 1.86               | 0.80                  |
| Somatomedin B and thrombospondin type 1 domain containing | SBSPON   | 2.17               | 0.79                  |
| Adenylate kinase isoenzyme 1                              | AK1      | 2.50               | 0.78                  |
| Syndecan 4                                                | SDC4     | 1.46               | 0.77                  |
| Proline and arginine rich end leucine rich repeat protein | PRELP    | 1.90               | 0.73                  |
| Myristoylated alanine rich protein kinase C substrate     | MARCKS   | 1.56               | 0.72                  |
| Carbonic anhydrase 4                                      | CA4      | 2.24               | 0.72                  |
| Spindlin 1                                                | SPIN1    | 1.55               | 0.71                  |
| Periaxin                                                  | PRX      | 1.30               | 0.67                  |
| TBC1 domain family member 5                               | TBC1D5   | 1.65               | 0.66                  |
| Annexin                                                   | ANXA4    | 1.57               | 0.65                  |
| Family with sequence similarity 192 member A              | FAM192A  | 1.87               | 0.65                  |
| Prohibitin                                                | PHB      | 2.26               | 0.64                  |
| Dipeptidase                                               | DPEP1    | 2.21               | 0.63                  |
| Retinol-binding protein 4                                 | RBP4     | 1.69               | 0.63                  |
| WD repeat domain 3                                        | WDR3     | 1.50               | 0.62                  |
| MICOS complex subunit                                     | CHCHD3   | 1.38               | 0.61                  |
| Apolipoprotein C-I                                        | apoCI    | 2.20               | 0.60                  |
| Thymidine kinase 2, mitochondrial                         | TK2      | 1.62               | 0.60                  |
| Collagen alpha-2(I) chain                                 | COL1A2   | 1.40               | 0.59                  |
| Mitochondrial ribosomal protein S26                       | MRPS26   | 1.52               | 0.59                  |
| Proteasome assembly chaperone 4                           | PSMG4    | 1.91               | -0.59                 |

|                                                                    |          |      |       |
|--------------------------------------------------------------------|----------|------|-------|
| Armadillo like helical domain containing 3                         | ARMH3    | 1.60 | -0.60 |
| Signal peptide peptidase like 2A                                   | SPPL2A   | 1.67 | -0.60 |
| Bactericidal permeability-increasing protein                       | BPI      | 1.43 | -0.61 |
| Dedicator of cytokinesis 8                                         | DOCK8    | 1.86 | -0.61 |
| UBIQUITIN_CONJUGAT_2 domain-containing protein                     | UBE2I    | 1.55 | -0.62 |
| Eukaryotic translation initiation factor 4E family member 2        | EIF4E2   | 1.83 | -0.62 |
| Antioxidant 1 copper chaperone                                     | ATOX1    | 1.77 | -0.62 |
| Granulin precursor                                                 | GRN      | 1.47 | -0.63 |
| 4a-hydroxytetrahydrobiopterin dehydratase                          | PCBD2    | 1.40 | -0.63 |
| Exosome component 10                                               | EXOSC10  | 1.40 | -0.63 |
| Deoxyhypusine synthase                                             | DHPS     | 1.81 | -0.63 |
| Cilia and flagella associated protein 36                           | CFAP36   | 1.76 | -0.64 |
| WD repeat domain 54                                                | WDR54    | 2.21 | -0.64 |
| Myeloperoxidase                                                    | MPO      | 1.66 | -0.64 |
| Phospholysine phosphohistidine inorganic pyrophosphate phosphatase | LHPP     | 1.85 | -0.64 |
| Phospholipase B-like                                               | PLBD2    | 1.84 | -0.67 |
| Mitochondrial ribosomal protein L44                                | MRPL44   | 1.57 | -0.69 |
| Formin binding protein 4                                           | FNBP4    | 1.76 | -0.69 |
| Cytosolic phospholipase A2                                         | PLA2G4A  | 1.72 | -0.69 |
| Dystonin                                                           | DST      | 1.43 | -0.70 |
| Cathepsin A                                                        | CTSA     | 1.93 | -0.70 |
| Threonine synthase like 2                                          | THNSL2   | 1.31 | -0.71 |
| Karyopherin subunit alpha 1                                        | KPNA1    | 1.73 | -0.72 |
| Galectin-9                                                         | LGALS9   | 1.61 | -0.75 |
| Microtubule-associated proteins 1A/1B light chain 3C               | MAP1LC3C | 2.30 | -0.76 |
| CD109 molecule                                                     | CD109    | 2.10 | -0.76 |
| Golgi phosphoprotein 3 like                                        | GOLPH3L  | 1.38 | -0.78 |
| STEAP4 metalloreductase                                            | STEAP4   | 1.43 | -0.79 |
| Tetraspanin                                                        | CD82     | 1.42 | -0.80 |
| Asparagine synthetase [glutamine-hydrolyzing]                      | ASNS     | 2.24 | -0.81 |
| Interferon induced protein with tetratricopeptide repeats 3        | IFIT3    | 1.93 | -0.81 |
| Colony stimulating factor 1 receptor                               | CSF1R    | 2.75 | -0.85 |
| V-set and immunoglobulin domain containing 4                       | VSIG4    | 2.29 | -0.86 |
| Pentraxin 3                                                        | PTX3     | 1.88 | -0.86 |
| Mitochondrial ribosomal protein S9                                 | MRPS9    | 1.38 | -0.87 |
| TP53 induced glycolysis regulatory phosphatase                     | TIGAR    | 1.48 | -0.87 |
| Myotubularin related protein 14                                    | MTMR14   | 1.56 | -0.88 |
| Cathepsin K                                                        | CTSK     | 2.54 | -0.89 |
| WD repeat domain 11                                                | WDR11    | 1.42 | -0.90 |
| Metalloproteinase inhibitor 1                                      | TIMP1    | 1.44 | -0.91 |
| Immunoglobulin J chain                                             | JCHAIN   | 1.95 | -0.92 |
| Ribosome production factor 2 homolog                               | RPF2     | 1.36 | -0.92 |
| Phospholipid transfer protein                                      | PLTP     | 1.71 | -0.93 |
| Tetraspanin                                                        | TSPAN1   | 1.84 | -0.93 |
| Leucine rich pentatricopeptide repeat containing                   | LRPPRC   | 1.78 | -0.95 |
| Bystin like                                                        | BYSL     | 1.80 | -0.96 |
| 2'-5'-oligoadenylate synthetase 3                                  | OAS3     | 1.66 | -1.01 |
| Vav guanine nucleotide exchange factor 1                           | VAV1     | 2.39 | -1.02 |
| EMG1 N1-specific pseudouridine methyltransferase                   | EMG1     | 1.64 | -1.03 |
| DDB1- and CUL4-associated factor 11                                | DCAF11   | 2.19 | -1.05 |

|                                               |         |      |       |
|-----------------------------------------------|---------|------|-------|
| Guanylate binding protein 1                   | GBP1    | 1.41 | -1.06 |
| Negative elongation factor complex member C/D | NELFCD  | 2.56 | -1.13 |
| Tyrosyl-tRNA synthetase 2                     | YARS2   | 2.14 | -1.20 |
| Uncharacterized protein                       | AKR1C1L | 1.73 | -1.20 |
| 2'-5'-oligoadenylate synthetase 2             | OAS2    | 1.60 | -1.24 |
| Malonyl-CoA-acyl carrier protein transacylase | MCAT    | 2.56 | -1.38 |
| Hcy-binding domain-containing protein         | BHMT    | 1.35 | -1.46 |
| Fructose-bisphosphate aldolase B              | ALDOB   | 1.57 | -1.48 |
| Arginase                                      | ARG1    | 4.16 | -1.89 |

**Table S2.** List of proteins significantly modulated by the treatment with rosiglitazone 10 mg/kg. Proteins were considered significantly upregulated in case of  $\text{Log}(p\text{-value}) \geq 1.3$  and  $\text{Log}_2(\text{Fold-change}) \geq 0.5849$  and significantly downregulated in case of  $\text{Log}(p\text{-value}) \geq 1.3$  and  $\text{Log}_2(\text{Fold-change}) \leq -0.5849$ .

| Protein Description                                               | Genename | $-\text{Log}(p\text{-value})$ | $\text{Log}_2(\text{FC})$ |
|-------------------------------------------------------------------|----------|-------------------------------|---------------------------|
| C-reactive protein                                                | CRP      | 1.54                          | 2.51                      |
| STEAP4 metalloredutase                                            | STEAP4   | 1.76                          | 2.05                      |
| Myelin P2 protein                                                 | PMP2     | 5.44                          | 1.97                      |
| Histone deacetylase 3                                             | HDAC3    | 5.13                          | 1.85                      |
| WASP actin nucleation promoting factor                            | WAS      | 3.62                          | 1.81                      |
| Late endosomal/lysosomal adaptor, MAPK and MTOR activator 5       | LAMTOR5  | 1.42                          | 1.67                      |
| Complement component C8 alpha chain                               | C8A      | 2.90                          | 1.59                      |
| Apolipoprotein C-III                                              | APOC3    | 3.04                          | 1.58                      |
| Peptidoglycan recognition protein 2                               | PGLYRP2  | 4.24                          | 1.54                      |
| ABI family member 3                                               | ABI3     | 1.41                          | 1.53                      |
| Resistin                                                          | RETN     | 3.36                          | 1.49                      |
| C-C motif chemokine ligand 14                                     | CCL14    | 1.72                          | 1.47                      |
| Protein S100-A12                                                  | S100A12  | 2.22                          | 1.39                      |
| Aldehyde oxidase 4                                                | AOX4     | 1.74                          | 1.39                      |
| BCL2 associated X, apoptosis regulator                            | BAX      | 2.90                          | 1.38                      |
| Protein S100                                                      | S100A8   | 2.30                          | 1.37                      |
| Sequestosome 1                                                    | SQSTM1   | 2.77                          | 1.37                      |
| Lactotransferrin                                                  | LTF      | 2.19                          | 1.34                      |
| BolaA-like protein 3                                              | BOLA3    | 2.16                          | 1.33                      |
| Spectrin beta chain                                               | SPTB     | 2.62                          | 1.25                      |
| Complement component C8 gamma chain                               | C8G      | 2.28                          | 1.24                      |
| Syndecan 4                                                        | SDC4     | 2.16                          | 1.22                      |
| Protein S100                                                      | S100A9   | 2.62                          | 1.21                      |
| Lipocalin 2                                                       | LCN2     | 2.00                          | 1.21                      |
| Apolipoprotein B                                                  | APOB     | 2.50                          | 1.16                      |
| Ubiquitin specific peptidase 19                                   | USP19    | 1.34                          | 1.16                      |
| Lipopolysaccharide-binding protein                                | LBP      | 1.46                          | 1.13                      |
| Mevalonate kinase                                                 | MVK      | 2.39                          | 1.13                      |
| Ribosomal RNA processing 15 homolog                               | RRP15    | 1.58                          | 1.12                      |
| G protein-coupled receptor class C group 5 member C               | GPRC5C   | 2.56                          | 1.10                      |
| Peptidoglycan-recognition protein                                 | PGLYRP1  | 2.78                          | 1.10                      |
| X-prolyl aminopeptidase 2                                         | XPNPEP2  | 1.91                          | 1.07                      |
| RNA binding motif protein 19                                      | RBM19    | 1.33                          | 1.05                      |
| Grancalcin                                                        | GCA      | 3.08                          | 1.05                      |
| Hexokinase 3                                                      | HK3      | 4.15                          | 1.04                      |
| Macrophage stimulating 1                                          | MST1     | 2.90                          | 1.04                      |
| PYD and CARD domain containing                                    | PYCARD   | 1.48                          | 1.01                      |
| Chromosome 11 open reading frame 96                               | C11orf96 | 1.45                          | 1.00                      |
| Coagulation factor V                                              | F5       | 1.67                          | 0.98                      |
| Chitinase 1                                                       | CHIT1    | 1.62                          | 0.97                      |
| Haptoglobin                                                       | HP       | 3.29                          | 0.94                      |
| Solute carrier family 4 member 1 (Diego blood group)              | SLC4A1   | 3.01                          | 0.92                      |
| CAP18_C domain-containing protein                                 | CAMP     | 2.71                          | 0.91                      |
| Ferritin light chain                                              | FTL      | 2.11                          | 0.88                      |
| ATP binding cassette subfamily B member 6 (Langereis blood group) | ABCB6    | 2.19                          | 0.87                      |
| Chromosome 9 open reading frame 78                                | C9orf78  | 2.28                          | 0.87                      |

|                                                                |         |      |       |
|----------------------------------------------------------------|---------|------|-------|
| Myeloperoxidase                                                | MPO     | 1.70 | 0.85  |
| Fetuin B                                                       | FETUB   | 3.29 | 0.84  |
| Ras-related protein Rab-32                                     | RAB32   | 2.50 | 0.80  |
| Integrin subunit alpha M                                       | ITGAM   | 1.71 | 0.79  |
| 4-hydroxyphenylpyruvate dioxygenase                            | HPD     | 1.42 | 0.78  |
| Angiotensinogen                                                | AGT     | 5.10 | 0.78  |
| Synapse associated protein 1                                   | SYAP1   | 1.99 | 0.77  |
| Apolipoprotein C-I                                             | apoCI   | 2.51 | 0.77  |
| Pre-mRNA-splicing factor 18                                    | PRPF18  | 1.34 | 0.75  |
| Haloacid dehalogenase like hydrolase domain containing 3       | HDHD3   | 2.10 | 0.75  |
| Microtubule interacting and trafficking domain containing 1    | MITD1   | 2.61 | 0.73  |
| Apolipoprotein E                                               | APOE    | 2.00 | 0.73  |
| Solute carrier family 25 member 1                              | SLC25A1 | 1.42 | 0.71  |
| Multiple coagulation factor deficiency protein 2               | MCFD2   | 1.46 | 0.68  |
| Synuclein alpha                                                | SNCA    | 1.51 | 0.66  |
| Ubiquitin associated protein 2                                 | UBAP2   | 1.34 | 0.64  |
| Complement C6                                                  | C6      | 2.66 | 0.64  |
| Alpha-2-HS-glycoprotein                                        | AHSG    | 2.84 | 0.64  |
| Hemopexin                                                      | HPX     | 1.33 | 0.64  |
| Complement component C8 beta chain                             | C8B     | 3.29 | 0.64  |
| Pro-interleukin-16                                             | IL16    | 1.47 | 0.63  |
| WAPL cohesin release factor                                    | WAPL    | 1.86 | 0.63  |
| Complement factor properdin                                    | CFP     | 1.88 | 0.62  |
| Coiled-coil domain containing 12                               | CCDC12  | 1.36 | 0.61  |
| Vitamin D-binding protein                                      | GC      | 4.36 | 0.61  |
| 4HBT domain-containing protein                                 | ACOT13  | 2.78 | 0.61  |
| Integrator complex subunit 12                                  | INTS12  | 1.43 | 0.59  |
| t-SNARE coiled-coil homology domain-containing protein         | SNAP29  | 1.52 | 0.59  |
| WD repeat domain 43                                            | WDR43   | 1.54 | 0.59  |
| Roundabout guidance receptor 4                                 | ROBO4   | 1.44 | -0.59 |
| Transforming growth factor beta-1-induced transcript 1 protein | TGFB1I1 | 3.77 | -0.59 |
| IF rod domain-containing protein                               | KRT18   | 2.18 | -0.59 |
| Peroxidasin                                                    | PXDN    | 3.43 | -0.59 |
| Uveal autoantigen with coiled-coil domains and ankyrin repeats | UACA    | 2.19 | -0.59 |
| Fibronectin leucine rich transmembrane protein 3               | FLRT3   | 1.67 | -0.59 |
| Proliferating cell nuclear antigen                             | PCNA    | 3.82 | -0.60 |
| Protein tyrosine phosphatase 4A2                               | PTP4A2  | 3.05 | -0.60 |
| Calcium binding protein 39 like                                | CAB39L  | 1.60 | -0.60 |
| Intercellular adhesion molecule 2                              | ICAM2   | 1.82 | -0.60 |
| TATA box-binding protein-like 1                                | TBPL1   | 1.77 | -0.62 |
| Ras-related protein Rab-25                                     | RAB25   | 1.35 | -0.63 |
| Minichromosome maintenance complex component 5                 | MCM5    | 1.89 | -0.63 |
| Integrin subunit alpha 6                                       | ITGA6   | 2.27 | -0.63 |
| RAB3A interacting protein                                      | RAB3IP  | 1.54 | -0.63 |
| Solute carrier family 27 member 3                              | SLC27A3 | 1.32 | -0.64 |
| Eukaryotic elongation factor 2 kinase                          | EEF2K   | 1.91 | -0.64 |
| ATP-dependent translocase ABCB1                                | ABCB1   | 1.61 | -0.65 |
| Ribosomal protein L37                                          | RPL37   | 1.92 | -0.65 |
| SPARC                                                          | SPARC   | 2.30 | -0.65 |
| Ectonucleoside triphosphate diphosphohydrolase 1               | ENTPD1  | 3.58 | -0.65 |
| Intraflagellar transport protein 27 homolog                    | IFT27   | 1.51 | -0.65 |

|                                                                                                 |          |      |       |
|-------------------------------------------------------------------------------------------------|----------|------|-------|
| Vimentin                                                                                        | VIM      | 1.60 | -0.65 |
| Neuronal cell adhesion molecule                                                                 | NRCAM    | 1.42 | -0.66 |
| Prolylcarboxypeptidase                                                                          | PRCP     | 2.13 | -0.66 |
| Vesicle amine transport 1 like                                                                  | VAT1L    | 2.93 | -0.66 |
| Tetratricopeptide repeat domain 9C                                                              | TTC9C    | 1.64 | -0.67 |
| Cartilage associated protein                                                                    | CRTAP    | 2.26 | -0.68 |
| Docking protein 1                                                                               | DOK1     | 2.55 | -0.68 |
| Filamin binding LIM protein 1                                                                   | FBLIM1   | 2.10 | -0.69 |
| Nuclear factor I B                                                                              | NFIB     | 2.54 | -0.69 |
| Glycoprotein nmb                                                                                | GPNMB    | 1.60 | -0.69 |
| Fibrillin 2                                                                                     | FBN2     | 3.22 | -0.69 |
| G protein-coupled receptor kinase                                                               | GRK6     | 1.55 | -0.71 |
| Cyclin K                                                                                        | CCNK     | 1.50 | -0.72 |
| Platelet-derived growth factor receptor beta                                                    | PDGFRB   | 3.34 | -0.72 |
| CD300 molecule like family member g                                                             | CD300LG  | 1.32 | -0.72 |
| GIT ArfGAP 1                                                                                    | GIT1     | 1.73 | -0.73 |
| Fibulin 2                                                                                       | FBLN2    | 2.22 | -0.73 |
| DNA replication licensing factor MCM7                                                           | MCM7     | 1.79 | -0.73 |
| Cyclin dependent kinase 7                                                                       | CDK7     | 1.41 | -0.74 |
| Microtubule associated protein RP/EB family member 3                                            | MAPRE3   | 1.30 | -0.75 |
| Phosphate cytidylyltransferase 1, choline, alpha                                                | PCYT1A   | 4.77 | -0.75 |
| Stathmin                                                                                        | STMN1    | 2.55 | -0.76 |
| DNA helicase                                                                                    | LPH      | 2.96 | -0.76 |
| Signal transducing adaptor molecule 2                                                           | STAM2    | 2.04 | -0.76 |
| STT3 oligosaccharyltransferase complex catalytic subunit B                                      | STT3B    | 1.57 | -0.76 |
| Amyloid beta precursor like protein 2                                                           | APLP2    | 1.57 | -0.78 |
| Apoptotic peptidase activating factor 1                                                         | APAF1    | 1.39 | -0.78 |
| Acyl-CoA thioesterase 7                                                                         | ACOT7    | 2.11 | -0.78 |
| SEC11 homolog A, signal peptidase complex subunit                                               | SEC11A   | 1.36 | -0.79 |
| Rabenosyn, RAB effector                                                                         | RBSN     | 1.63 | -0.81 |
| Dedicator of cytokinesis 4                                                                      | DOCK4    | 1.80 | -0.81 |
| Negative regulator of ubiquitin like proteins 1                                                 | NUB1     | 1.45 | -0.83 |
| CD93 molecule                                                                                   | CD93     | 2.34 | -0.84 |
| Ectonucleotide pyrophosphatase/phosphodiesterase 4                                              | ENPP4    | 1.56 | -0.84 |
| Minichromosome maintenance complex component 2                                                  | MCM2     | 3.58 | -0.86 |
| Protein disulfide isomerase family A member 5                                                   | PDIA5    | 1.97 | -0.88 |
| Calmodulin regulated spectrin associated protein family member 2                                | CAMSAP2  | 1.91 | -0.90 |
| Sperm associated antigen 1                                                                      | SPAG1    | 1.43 | -0.91 |
| Nephronectin                                                                                    | NPNT     | 1.62 | -0.91 |
| Protein arginine methyltransferase 3                                                            | PRMT3    | 1.40 | -0.92 |
| Beta-carotene oxygenase 2                                                                       | BCO2     | 1.50 | -0.92 |
| SWI/SNF related, matrix associated, actin dependent regulator of chromatin subfamily c member 1 | SMARCC1  | 2.07 | -0.93 |
| Immunoglobulin superfamily containing leucine rich repeat                                       | ISLR     | 1.51 | -0.94 |
| DNA helicase                                                                                    | MCM4     | 3.48 | -0.94 |
| Phosphate regulating endopeptidase homolog X-linked                                             | PHEX     | 1.79 | -0.94 |
| ARVCF delta catenin family member                                                               | ARVCF    | 1.82 | -0.94 |
| Periostin                                                                                       | POSTN    | 3.16 | -0.97 |
| Rho guanine nucleotide exchange factor 26                                                       | ARHGEF26 | 1.65 | -0.97 |
| Metalloproteinase inhibitor 3 (Fragment)                                                        | TIMP3    | 2.02 | -0.98 |

|                                                  |         |      |       |
|--------------------------------------------------|---------|------|-------|
| Integrator complex subunit 2                     | INTS2   | 1.75 | -0.99 |
| DAB adaptor protein 2                            | DAB2    | 1.59 | -1.01 |
| FSHD region gene 1                               | FRG1    | 2.01 | -1.03 |
| Protein pelota homolog                           | PELO    | 1.56 | -1.04 |
| Chromosome X open reading frame 38               | CXorf38 | 1.39 | -1.06 |
| Collagen type IV alpha 6 chain                   | COL4A6  | 1.31 | -1.08 |
| KN motif and ankyrin repeat domains 1            | KANK1   | 2.70 | -1.14 |
| Ribonuclease 4                                   | RNASE4  | 2.49 | -1.15 |
| Protein kinase domain-containing protein         | NEK7    | 1.42 | -1.18 |
| Decorin                                          | DCN     | 1.85 | -1.18 |
| DNA helicase                                     | MCM3    | 3.03 | -1.20 |
| Euchromatic histone lysine methyltransferase 1   | EHMT1   | 1.96 | -1.21 |
| acidPPc domain-containing protein                | PLPP3   | 2.19 | -1.25 |
| Calcitonin receptor like receptor                | CALCRL  | 1.86 | -1.26 |
| TPD52 like 1                                     | TPD52L1 | 2.30 | -1.27 |
| Par-3 family cell polarity regulator beta        | PARD3B  | 2.53 | -1.29 |
| SPARC like 1                                     | SPARCL1 | 2.25 | -1.31 |
| 5-demethoxyubiquinone hydroxylase, mitochondrial | COQ7    | 1.58 | -1.35 |
| Integrin beta-3                                  | ITGB3   | 2.04 | -1.39 |
| E1A binding protein p300                         | EP300   | 2.59 | -1.46 |
| AKT interacting protein                          | AKTIP   | 2.21 | -1.46 |
| TRPM8 channel associated factor 1                | TCAF1   | 1.40 | -1.46 |
| PDZ and LIM domain protein 4                     | PDLIM4  | 2.38 | -1.47 |
| Ribonucleotide reductase regulatory subunit M2   | RRM2    | 3.14 | -1.49 |
| Collectin subfamily member 12                    | COLEC12 | 2.24 | -1.58 |
| Death associated protein kinase 1                | DAPK1   | 1.77 | -1.97 |
| Hyaluronan and proteoglycan link protein 1       | HAPLN1  | 1.94 | -2.27 |
| Nucleoporin 210                                  | NUP210  | 1.54 | -2.34 |
| Chromosome 2 open reading frame 49               | C2orf49 | 1.70 | -3.13 |
